# Supplementary material
Source: publisher site journal article supplement (https://www.e-cmh.org/upload/media/cmh-2023-0057-Supplementary-Table-2.pdf)
Supplement: Supplementary file 1 [file cmh-2023-0057-Supplementary-Table-2.pdf]

**Supplementary Table 2.** International Prognostic Index for DLBCL

---

**Prognostic factors**

Age >60 years  
ECOG performance status >2  
Lactate dehydrogenase > upper normal limit  
Extranodal sites >2  
Stage III or IV

---

**Risk category**

Low (0 or 1)  
Low-intermediate (2)  
High-intermediate (3)  
High (4 or 5)

---

DLBCL, diffuse large B-cell lymphoma; ECOG, Eastern Cooperative Oncology Group.
